# Supplementary material for: Sm complex assembly and 5′ cap trimethylation promote selective processing of snRNAs by the 3′ exonuclease TOE1
Source: PubMed Central journal article supplement (PMC10801842; doi:10.1073/pnas.2315259121), 2024-01-09
Supplement: pnas.2315259121.sapp.pdf [file pnas.2315259121.sapp.pdf]

## Supporting Information for

Sm complex assembly and 5' cap trimethylation promote selective processing of snRNAs by the 3' exonuclease TOE1

Tiantai Ma, Erica S. Xiong, Rea M. Lardelli\*, and Jens Lykke-Andersen\*

\*Jens Lykke-Andersen, Rea M. Lardelli

**Email:** [jlykkeandersen@ucsd.edu](mailto:jlykkeandersen@ucsd.edu), [reamartine@gmail.com](mailto:reamartine@gmail.com)

### This PDF file includes:

- Supplementary text
- Supplementary Figures S1-S7
- Supplementary Tables S1-S2

## Supplementary Figures

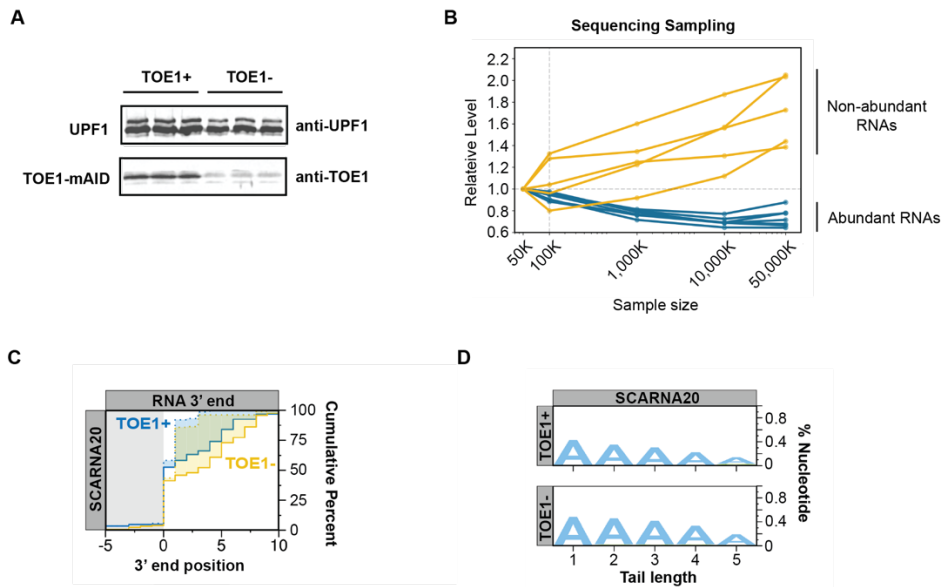

### Supplementary Figure S1 related to Figure 1. TOE1 shows specificity towards Pol II snRNAs. (A)

Western blots showing depletion of TOE1. UPF1 serves as a loading control. **(B)** Plot showing the fraction of non-duplicate mapped reads for abundant small ncRNAs (RNU1, RNU2, RNU2-2P, SNORD3, RN7SL1, RN7SL2, RN7SL3, RN7SK) compared with select low abundance RNAs (SNORD13, SNORA71A, SNORA70, SNORA77B, SNORA71C) following sampling of 50k to 50,000k total reads, as normalized to sampling of 50k total reads. The vertical dashed line shows the sampling size (100k reads) used for analyses of the shown abundant small ncRNAs. All other RNAs were analyzed from the full library. **(C)** Cumulative plot showing distributions of 3' end positions for SCARNA20 in control (TOE1+, blue) and TOE1-depleted (TOE1-, yellow) conditions. **(D)** Sequence logo plots representing the percentage of post-transcriptionally added nucleotides for SCARNA20 under control (TOE1+) or TOE1-depleted (TOE1-) conditions.

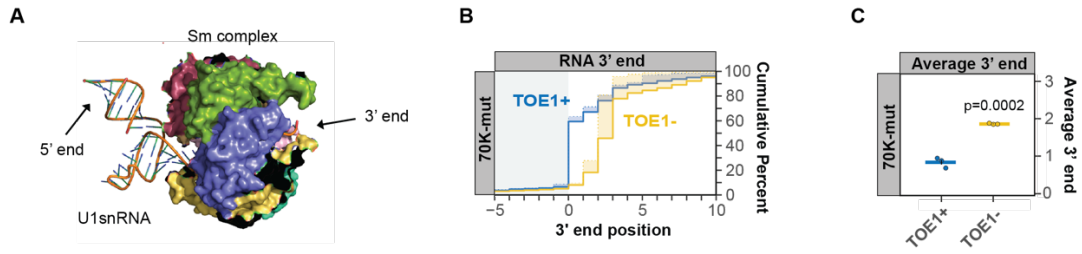

**Supplementary Figure S2 related to Figure 2. Mutations in Sm complex- and U1-70K-binding motifs of U1 snRNA inhibit 3' end processing. (A)** Structure of U1 snRNA associated with the Sm complex based on X-ray crystallography (69). **(B)** Cumulative plot showing 3' end distributions for the 70K-mutant U1 snRNA under TOE1+ (blue) or TOE1- (yellow) conditions. **(C)** Average 3' end positions for the 70K mutant U1 snRNA in TOE1+ (blue) and TOE1- (yellow) conditions.

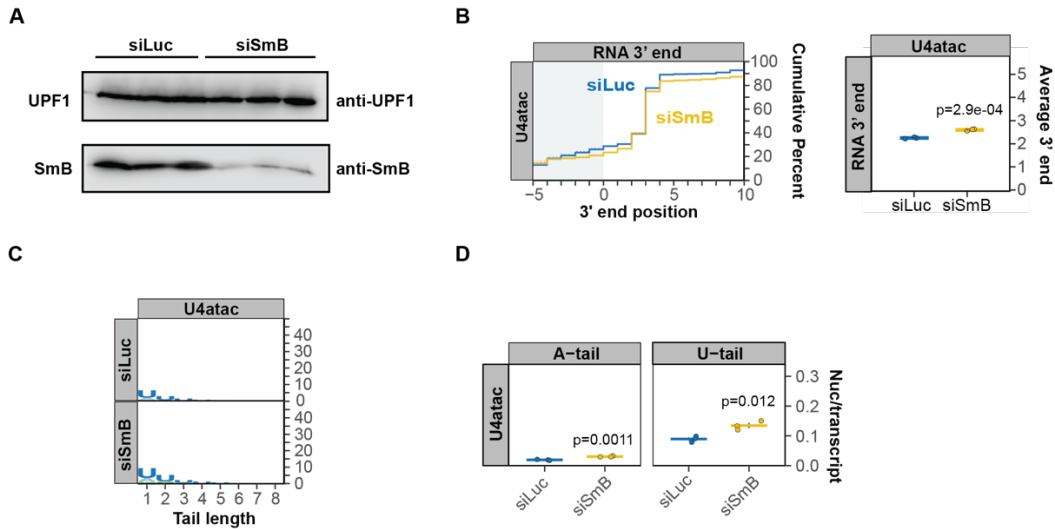

**Supplementary Figure S3 related to Figure 3. Sm complex depletion impairs 3' end processing of multiple Pol II snRNAs. (A)** Western blot showing depletion of SmB. UPF1 serves as a loading control. **(B)** Left, cumulative plots showing 3' end distributions of nascent minor class Pol II snRNA U4atac in control (siLuc; blue) versus SmB (siSmB; yellow) depleted conditions. The average of three individual biological repeats is plotted. Right, average 3' end lengths for U4atac snRNA. Dots represent individual biological repeats and SEMs are shown as vertical black lines. P-values were calculated by Student's two-tailed t-test. **(C)** Sequence logo plots representing the percentage of post-transcriptionally added nucleotides for U4atac snRNA under control (siLuc) or SmB knock down (siSmB) conditions. **(D)** Average number of post-transcriptionally added adenosine or uridine nucleotides per transcript for U4atac snRNA, plotted as in panel B.

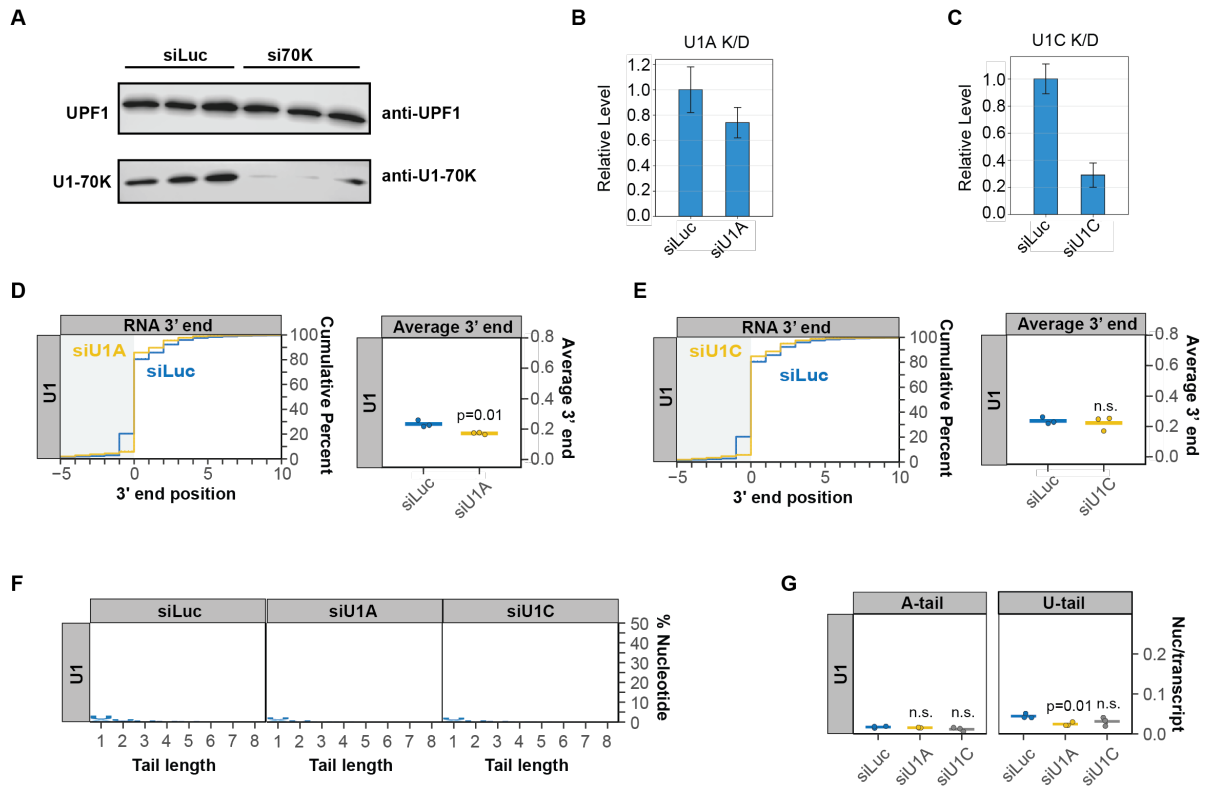

**Supplementary Figure S4 related to Figure 4. U1-70K compensates for a suboptimal Sm binding motif to stimulate U1 snRNA 3' end processing.** (A) Western blot showing depletion of U1-70K. UPF1 serves as a loading control. (B, C) Relative levels of U1A (panel B) and U1C (panel C) mRNAs in U1A- and U1C-depleted conditions, respectively, compared to control (siLuc) conditions, measured by RT-qPCR. Samples were normalized to the average level of GAPDH and Mitochondrial 12S rRNA. Error bars represent SEMs from three individual experiments. (D, E) Left, cumulative plots showing 3' end distributions of nascent U1 snRNA in control (siLuc; blue) versus U1A (panel D) or U1C (panel E) (yellow) knock-down conditions. Right, average 3' end lengths for U1 snRNA. Dots represent individual biological repeats and SEMs are shown as vertical black lines. P-values were calculated by Student's two-tailed t-test. (F) Sequence logo plots representing the percentage of post-transcriptionally added nucleotides for nascent U1 snRNA under control (siLuc), U1A knock-down (siU1A), and U1C knock-down (siU1C) conditions. (G) Average number of post-transcriptionally added adenosine or uridine nucleotides per transcript, plotted as in panels D and E.

**A**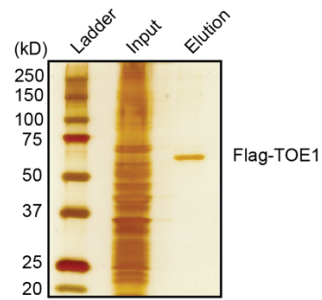**B**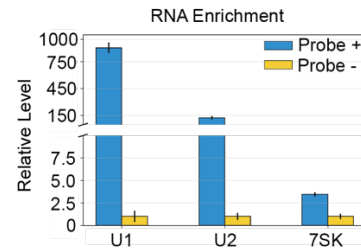

**Supplementary Figure S5 related to Figure 6. TOE1 directly recognizes the Sm complex-**

**assembled U1 snRNP. (A)** Representative silver-stained gel showing the Flag-TOE1 IP input and elution

fractions. kD = kilodaltons. **(B)** Bar plots showing the relative enrichment of U1, U2, and 7SK RNAs

following 2'-OMe-RNA oligonucleotide pull-down, measured by RT-qPCR, in pull-down (probe+, Blue) and negative control (probe-, yellow) conditions. Mitochondrial 12S rRNA served as an internal control.

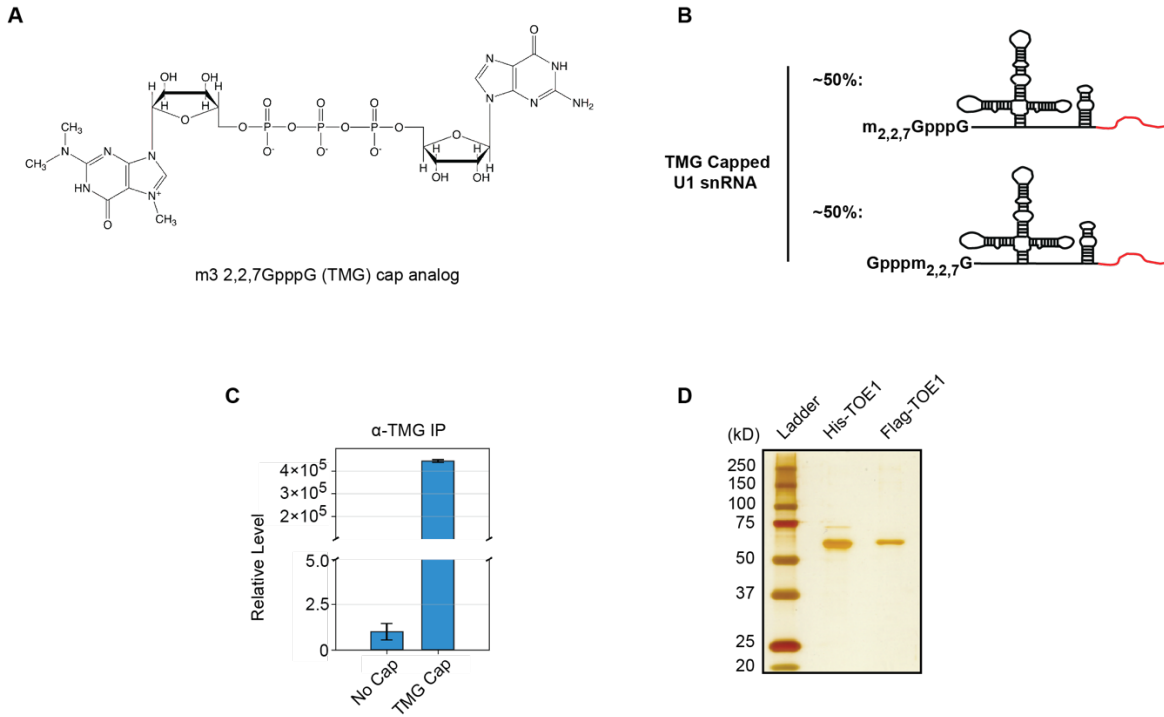

**Supplementary Figure S6 related to Figure 7. snRNA processing by TOE1 is stimulated by the 5' TMG cap. (A)** Structure of the TMG cap analog. **(B)** The TMG-capped U1 snRNA is a mixture of m<sub>2,2,7</sub>GpppG-capped and Gpppm<sub>2,2,7</sub>G-capped U1 snRNA. **(C)** Relative level of *in vitro* transcribed U1 snRNA with TMG cap or no cap following anti-TMG Immunoprecipitation, measured by RT-qPCR. Samples were normalized to input. **(D)** Representative silver-stained gel showing purified His- and Flag-tagged TOE1 proteins.

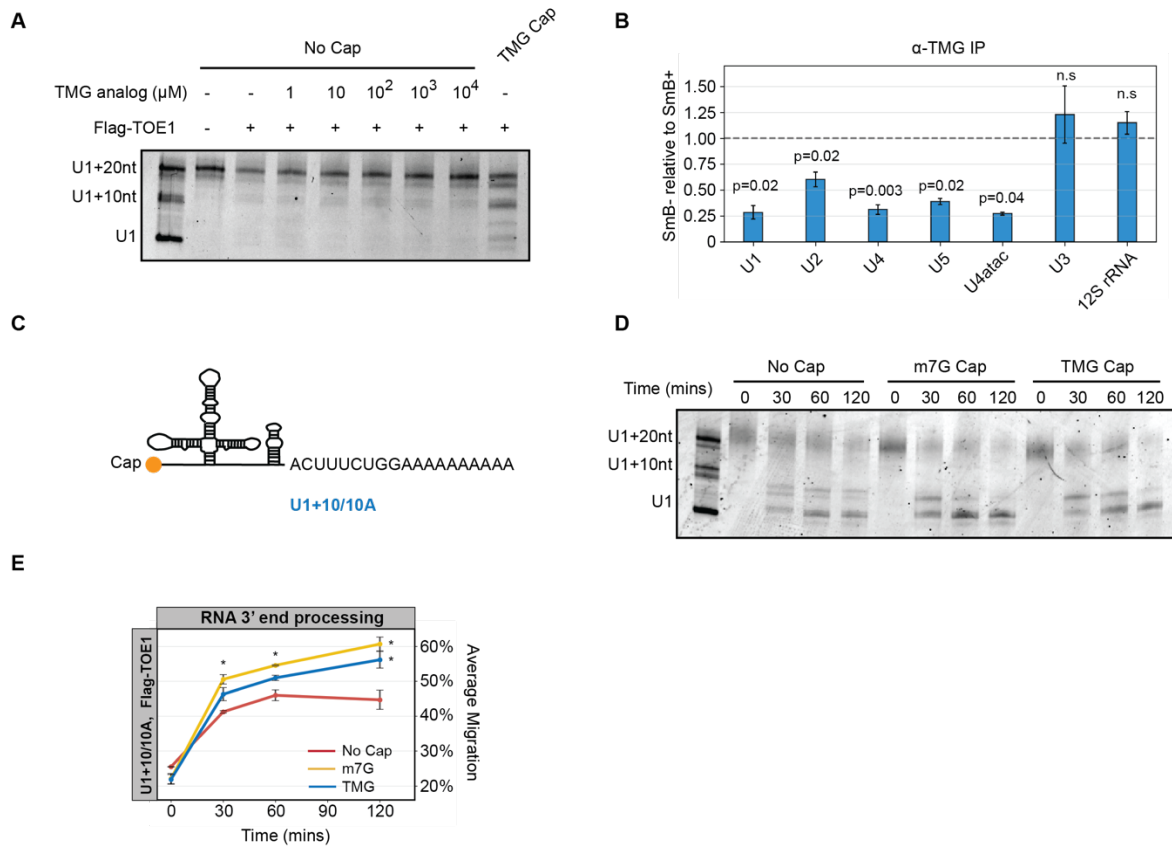

**Supplementary Figure S7. (A)** Representative denaturing gel showing U1+20 uncapped RNA substrate incubated with TMG cap analog at indicated concentrations and Flag-TOE1 *in vitro* for one hour. **(B)** Relative levels of Pol II snRNAs, U3 snoRNA, and 12S rRNA following TMG-IP, measured by qRT-PCR, normalizing SmB knock down (SmB-) conditions to control (SmB+) conditions. P-values are calculated by Student's two-tailed t-test comparing SmB- to SmB+ conditions. **(C)** Schematic of *in vitro* transcribed U1 snRNA with a 10-nucleotide genomic-encoded tail followed by a 10-nucleotides oligo(A) tail (U1+10/10A). **(D, E)** Same as Figure 7 panels B and C, using U1+10/10A RNA as the substrate for Flag-TOE1 processing.



## Supplementary TableS1

### Gene-specific sequencing primers

|       |                                                            |
|-------|------------------------------------------------------------|
| U1-01 | CAGACGTGTGCTCTTCCGATCT ATCG ATGATCACGAAGGTGGTTTT           |
| U1-02 | CAGACGTGTGCTCTTCCGATCT GAACG ATGATCACGAAGGTGGTTTT          |
| U1-03 | CAGACGTGTGCTCTTCCGATCT GTTGTA ATGATCACGAAGGTGGTTTT         |
| U1-04 | CAGACGTGTGCTCTTCCGATCT CTACCAT ATGATCACGAAGGTGGTTTT        |
| U1-05 | CAGACGTGTGCTCTTCCGATCT TGGCTTCA ATGATCACGAAGGTGGTTTT       |
| U1-06 | CAGACGTGTGCTCTTCCGATCT ACTACGTGT ATGATCACGAAGGTGGTTTT      |
| U1-07 | CAGACGTGTGCTCTTCCGATCT TCGTACACAG ATGATCACGAAGGTGGTTTT     |
| U1-08 | CAGACGTGTGCTCTTCCGATCT CACAGTATGAC ATGATCACGAAGGTGGTTTT    |
| U1-09 | CAGACGTGTGCTCTTCCGATCT ATGCTGACAAGT ATGATCACGAAGGTGGTTTT   |
| U1-10 | CAGACGTGTGCTCTTCCGATCT GTCAAGTGCTAGC ATGATCACGAAGGTGGTTTT  |
| U1-11 | CAGACGTGTGCTCTTCCGATCT CAATGTACGAACGT ATGATCACGAAGGTGGTTTT |
| U1-12 | CAGACGTGTGCTCTTCCGATCT TAGC ATGATCACGAAGGTGGTTTT           |
| U1-37 | CAGACGTGTGCTCTTCCGATCT AATC TTACCTGGCAGGGGAGATA            |
| U1-38 | CAGACGTGTGCTCTTCCGATCT TTCGA TTACCTGGCAGGGGAGATA           |
| U1-39 | CAGACGTGTGCTCTTCCGATCT CCAAAA TTACCTGGCAGGGGAGATA          |
| U1-40 | CAGACGTGTGCTCTTCCGATCT GGTTTTG TTACCTGGCAGGGGAGATA         |
| U2-01 | CAGACGTGTGCTCTTCCGATCT TACG GGAGATGGAATAGGAGCTTGC          |
| U2-02 | CAGACGTGTGCTCTTCCGATCT CTGCT GGAGATGGAATAGGAGCTTGC         |
| U2-03 | CAGACGTGTGCTCTTCCGATCT CAATCA GGAGATGGAATAGGAGCTTGC        |
| U2-04 | CAGACGTGTGCTCTTCCGATCT GTAGATG GGAGATGGAATAGGAGCTTGC       |
| U2-05 | CAGACGTGTGCTCTTCCGATCT AGCCATAG GGAGATGGAATAGGAGCTTGC      |
| U2-06 | CAGACGTGTGCTCTTCCGATCT TGTACAGCA GGAGATGGAATAGGAGCTTGC     |
| U3-01 | CAGACGTGTGCTCTTCCGATCT TACA CTCTGAACGTGTAGAGCAC            |
| U3-02 | CAGACGTGTGCTCTTCCGATCT ATGTA CTCTGAACGTGTAGAGCAC           |
| U3-03 | CAGACGTGTGCTCTTCCGATCT GCACGA CTCTGAACGTGTAGAGCAC          |
| U3-04 | CAGACGTGTGCTCTTCCGATCT AGTGCTA CTCTGAACGTGTAGAGCAC         |
| U3-05 | CAGACGTGTGCTCTTCCGATCT CAACTCGA CTCTGAACGTGTAGAGCAC        |
| U3-06 | CAGACGTGTGCTCTTCCGATCT TCTTGGATA CTCTGAACGTGTAGAGCAC       |
| U4-01 | CAGACGTGTGCTCTTCCGATCT CGTA GCAGTATCGTAGCCAATGAGG          |
| U4-02 | CAGACGTGTGCTCTTCCGATCT CGTTC GCAGTATCGTAGCCAATGAGG         |
| U4-03 | CAGACGTGTGCTCTTCCGATCT TACAAC GCAGTATCGTAGCCAATGAGG        |
| U4-04 | CAGACGTGTGCTCTTCCGATCT ATGGTAG GCAGTATCGTAGCCAATGAGG       |
| U4-05 | CAGACGTGTGCTCTTCCGATCT TGATGGCA GCAGTATCGTAGCCAATGAGG      |
| U4-06 | CAGACGTGTGCTCTTCCGATCT ACACGTTGT GCAGTATCGTAGCCAATGAGG     |
| U5-04 | CAGACGTGTGCTCTTCCGATCT GATGGTA AACTCTGGTTTCTTTCAGATCG      |
| U5-05 | CAGACGTGTGCTCTTCCGATCT ACCGAAGT AACTCTGGTTTCTTTCAGATCG     |
| U5-06 | CAGACGTGTGCTCTTCCGATCT TGATGCACA AACTCTGGTTTCTTTCAGATCG    |
| U5-07 | CAGACGTGTGCTCTTCCGATCT GACATTCGTA AACTCTGGTTTCTTTCAGATCG   |

|           |                                                             |
|-----------|-------------------------------------------------------------|
| U5-08     | CAGACGTGTGCTCTTCCGATCT ATGGA TAGTA ATACTCTGGTTTCTCTTCAGATCG |
| U5-09     | CAGACGTGTGCTCTTCCGATCT ATCATG ATACTCTGGTTTCTCTTCAGATCG      |
| U5-10     | CAGACGTGTGCTCTTCCGATCT TAGCATG ATACTCTGGTTTCTCTTCAGATCG     |
| U4atac-01 | CAGACGTGTGCTCTTCCGATCT CACT CATCCTTTTCTTGGGGTTGC            |
| U4atac-02 | CAGACGTGTGCTCTTCCGATCT TGTGC CATCCTTTTCTTGGGGTTGC           |
| U4atac-03 | CAGACGTGTGCTCTTCCGATCT ATTCCA CATCCTTTTCTTGGGGTTGC          |
| U4atac-04 | CAGACGTGTGCTCTTCCGATCT GAATTCA CATCCTTTTCTTGGGGTTGC         |
| U4atac-05 | CAGACGTGTGCTCTTCCGATCT GGTTAACC CATCCTTTTCTTGGGGTTGC        |
| U4atac-06 | CAGACGTGTGCTCTTCCGATCT TACCATTGA CATCCTTTTCTTGGGGTTGC       |

### qPCR primers

|                |                             |
|----------------|-----------------------------|
| U1-forward     | GCACTCCGGATGTGCTGACCC       |
| U1-reverse     | CAGGGGAAAGCGCGAACGCAG       |
| U2-forward     | TTTGGCTAAGATCAAGTGTAGTATCTG |
| U2-reverse     | AATCCATTTAATATATTGCCTCGGAT  |
| U3-forward     | AGAGGTAGCGTTTTCTCCTGAGCG    |
| U3-reverse     | ACCACTCAGACCGCGTTCTC        |
| U4-forward     | GCGCGATTATTGCTAATTGAAA      |
| U4-reverse     | AAAAATTGCCAATGCCGACTA       |
| U5-forward     | GGTTTCTCTTCAGATGGCATAAATC   |
| U5-reverse     | CTCAAAAAATTGGGTTAAGACTCAGA  |
| U4atac-forward | CCATCCTTTTCTTGGGGTTG        |
| U4atac-reverse | TAGTTGATGCGGGTGTGTTG        |
| 7sk-forward    | GAGGGCGATCTGGCTGCGACAT      |
| 7sk-reverse    | ACATGGAGCGGTGAGGGAGGAA      |
| 12s-forward    | ATGCAGCTCAAACGCTTAGC        |
| 12s-reverse    | GCTGGCACGAAATTGACCAA        |
| GAPDH-forward  | ACAAC TTTGGTATCGTGAAGG      |
| GAPDH-reverse  | GCCATCACGCCACAGTTTC         |
| U1A-forward    | GAAGAGGAAGCCCAAGAGCC        |
| U1A-reverse    | GGATTCTCAGAAAGAGGCTGGG      |
| U1C-forward    | ACTGCGATACATACCTCACCC       |
| U1C-reverse    | GTTGAAATGCAGCCGTTGTT        |

### Cloning primers

|                      |                                                  |
|----------------------|--------------------------------------------------|
| T7_U1-Forward        | TAATACGACTCACTATAGGGAGACCCAAGCTTATACTTACCTGGCAGG |
| T7_U1-Reverse-20geno | CTTTTGAAACTCCAGAAAGTCAG                          |
| T7_U1-Reverse-10A    | TTTTTTTTTCCAGAAAGTCAGGGGAA                       |

## RNA adapter

AG-10N /5Phos/AGNNNNNNNNNAGAU CGGAAGAGCGUCGUG/3SpC3/  
AG-11N /5Phos/AGNNNNNNNNNAGAU CGGAAGAGCGUCGUG/3SpC3/

## 5' cDNA adapter

3Tr3 /5Phos/AGATCGGAAGAGCACACGTCTG/3SpC3/

## library prep and sequencing

AR-17 ACACGACGCTCTTCCGA  
RC\_3Tr3 CAGACGTGTGCTCTTCCGATCT  
  
PCR\_F\_D501 AATGATACGGCGACCACCGAGATCTACAC TATAGCCT  
ACACTCTTTCCCTACACGACGCTCTTCCGATCT  
  
PCR\_F\_D502 AATGATACGGCGACCACCGAGATCTACAC ATAGAGGC  
ACACTCTTTCCCTACACGACGCTCTTCCGATCT  
  
PCR\_F\_D503 AATGATACGGCGACCACCGAGATCTACAC CCTATCCT  
ACACTCTTTCCCTACACGACGCTCTTCCGATCT  
PCR\_F\_D701 CAAGCAGAAGACGGCATA CGAGAT CGAGTAAT GTGACTGGAGTTCAGACGTGTGCTCTTCCGATC  
PCR\_F\_D702 CAAGCAGAAGACGGCATA CGAGAT TCTCCGGA GTGACTGGAGTTCAGACGTGTGCTCTTCCGATC  
PCR\_F\_D703 CAAGCAGAAGACGGCATA CGAGAT AATGAGCGGTGACTGGAGTTCAGACGTGTGCTCTTCCGATC  
PCR\_F\_D704 CAAGCAGAAGACGGCATA CGAGAT GGAATCTCGTACTGGAGTTCAGACGTGTGCTCTTCCGATC  
PCR\_F\_D705 CAAGCAGAAGACGGCATA CGAGAT TTCTGAATGTGACTGGAGTTCAGACGTGTGCTCTTCCGATC  
PCR\_F\_D706 CAAGCAGAAGACGGCATA CGAGAT ACGAATTCGTACTGGAGTTCAGACGTGTGCTCTTCCGATC

## siRNAs

siControl  
(siLuciferase) CGUACGCGAAUACUUCGAUU  
siSNRPB (SmB) CCGUAAGGCUGUACAUAGUUU  
siU1-70K GGUCUACAGUAAGCGGUCAUU  
siSNRPA (U1A) ON-TARGETplus Human SNRPA (6626) siRNA - Individual, 2 nmol, J-019435-17-0002, Dharmacon  
siSNRPC (U1C) CGGAAUGACUCGACCAGACUU

## 2'OMe-RNA-oligo probe

5'- mAmGmGmUmAmAmGmUmAmUmAmAmGmGmU  
mAmAmGmUmAmUmAmAmGmGmUmAmAmGmUmAmUmA/3Bio/ -3'

## Supplementary TableS2

### snRNA mutants

|                           |                                                                                                                                                                             |
|---------------------------|-----------------------------------------------------------------------------------------------------------------------------------------------------------------------------|
| Bar-coded U1 WT           | ATACTTACCTGGCAGGGGAGATACCATGATCACGAAGGTGGTTTTCCAGGGCG<br>AGGCTTATCCATTGCACTCCGGATGTGCTGACCCCTGCGATTTCCCCAAAGCTG<br>GGAAACTCGACTGCATAATTTGTGGTAGTGGGGGACTGCGTTCGCGCTTTCCCCTG |
| Bar-coded Sm-mut          | ATACTTACCTGGCAGGGGAGATACCATGATCACGAAGGTGGTTTTCCAGGGCG<br>AGGCTTATCCATTGCACTCCGGATGTGCTGACCCCTGCGATTTCCCCAAAGCTG<br>GGAAACTCGACTGCATAATCCCCGGTAGTGGGGGACTGCGTTCGCGCTTTCCCCTG |
| Bar-coded 70K-mut         | ATACTTACCTGGCAGGGGAGATACCAAGGCCACGAAGGTGGTTTTCCAGGGCG<br>AGGCTTATCCATTGCACTCCGGATGTGCTGACCCCTGCGATTTCCCCAAAGCTG<br>GGAAACTCGACTGCATAATTTGTGGTAGTGGGGGACTGCGTTCGCGCTTTCCCCTG |
| Bar-coded U1A-mut         | ATACTTACCTGGCAGGGGAGATACCATGATCACGAAGGTGGTTTTCCAGGGCG<br>AGGCTTATCCCTTCCAATCCGGATGTGCTGACCCCTGCGATTTCCCCAAAGCTG<br>GGAAACTCGACTGCATAATTTGTGGTAGTGGGGGACTGCGTTCGCGCTTTCCCCTG |
| Bar-coded SuperU1-mut     | ATACTTACCTGGCAGGGGAGATACCATGATCACGAAGGTGGTTTTCCAGGGCG<br>AGGCTTATCCATTGCACTCCGGATGTGCTGACCCCTGCGATTTCCCCAAAGCTG<br>GGAAACTCGACTGCATAATTTTTGGTAGTGGGGGACTGCGTTCGCGCTTTCCCCTG |
| Bar-coded SuperU1+70K-mut | ATACTTACCTGGCAGGGGAGATACCAAGGCCACGAAGGTGGTTTTCCAGGGCG<br>AGGCTTATCCATTGCACTCCGGATGTGCTGACCCCTGCGATTTCCCCAAAGCTG<br>GGAAACTCGACTGCATAATTTTTGGTAGTGGGGGACTGCGTTCGCGCTTTCCCCTG |
| Bar-coded U1v15           | ATACTTACTTGGCGGGGAGATACCATGATCACGAAGGTGGTTTTCTCAGGGCG<br>AGGCTTATCCGTTATGTTCCGGGTGTAAGTACCCCTGCCATTTCCCCAAAGCTG<br>AGGAACTCGACTGCATAAATTGTGATAGTAGGGGACTGCGTTCGCGCTTTCCCCTG |
| Bar-coded v15-U1A         | ATACTTACCTGGCAGGGGAGATACCATGATCACGAAGGTGGTTTTCCAGGGCG<br>AGGCTTATCCGTTATGTTCCGGATGTGCTGACCCCTGCGATTTCCCCAAAGCTG<br>GGAAACTCGACTGCATAATTTGTGGTAGTGGGGGACTGCGTTCGCGCTTTCCCCTG |
| Bar-coded v15-Sm          | ATACTTACCTGGCAGGGGAGATACCATGATCACGAAGGTGGTTTTCCAGGGCG<br>AGGCTTATCCATTGCACTCCGGATGTGCTGACCCCTGCGATTTCCCCAAAGCTG<br>GGAAACTCGACTGCATAAATTGTGATAGTGGGGGACTGCGTTCGCGCTTTCCCCTG |
| Bar-coded v15-SmWT        | ATACTTACTTGGCGGGGAGATACCATGATCACGAAGGTGGTTTTCTCAGGGCG<br>AGGCTTATCCGTTATGTTCCGGGTGTAAGTACCCCTGCCATTTCCCCAAAGCTG                                                             |

AGGAACTCGACTGCATAATTTGTGGTAGTAGGGGACTGCGTTCGCGCTTTCCCCTG

Bar-coded v15-super

ATACTTACTTGGCGGGGAGATACCATGATCACGAAGGTGGTTTTCTCAGGGCG

AGGCTTATCCGTTATGTTCCGGGTGACTGACCCCTGCCATTTTCCCCAAGCTG

AGGAACTCGACTGCATAATTTTGGTAGTAGGGGACTGCGTTCGCGCTTTCCCCTG
